# Supplementary material for: Coloured hybrid materials: exploiting an emergent surface property of fluorinated Al2O3 containing anthocyanins and betacyanins
Source: Royal Society of Chemistry journal article supplement (doi:10.1039/d2dt01294d), 2022-01-01

## Electronic Supporting Information

### Coloured hybrid materials: exploiting an emergent surface property of fluorinated Al<sub>2</sub>O<sub>3</sub> containing anthocyanins and betacyanins

Erik Pérez-Ramírez,<sup>a</sup> Ivan Kaleb Torres,<sup>a</sup> Ma. Jesús Martínez-Ortiz,<sup>b</sup> José L. Rivera,<sup>c</sup> Carlos Felipe,<sup>d</sup> Ariel Guzmán,<sup>b</sup> Ilich A. Ibarra\*<sup>a</sup> and Enrique Lima\*<sup>a</sup>

---

<sup>a</sup> Laboratorio de Físicoquímica y Reactividad de Superficies (LaFREs), Instituto de Investigaciones en Materiales, Universidad Nacional Autónoma de México, Circuito exterior s/n, Cd. Universitaria, Del., Coyoacán CP, Ciudad de México, 04510, Mexico.

<sup>b</sup> ESIQIE - Instituto Politécnico Nacional, Avenida IPN UPALM Edificio 7, Zacatenco, 07738 México D.F., México.

<sup>c</sup> Graduate School of Physics Engineering, Universidad Michoacana de San Nicolás de Hidalgo, Morelia, Michoacán, Mexico

<sup>d</sup> Department of Biosciences and Engineering, CIEMAD-Instituto Politécnico Nacional, Ciudad da México, 07340, Mexico

Fig S1. Powder XRD patterns of boehmite (3a) precursors of gamma alumina samples and gamma alumina samples (b)

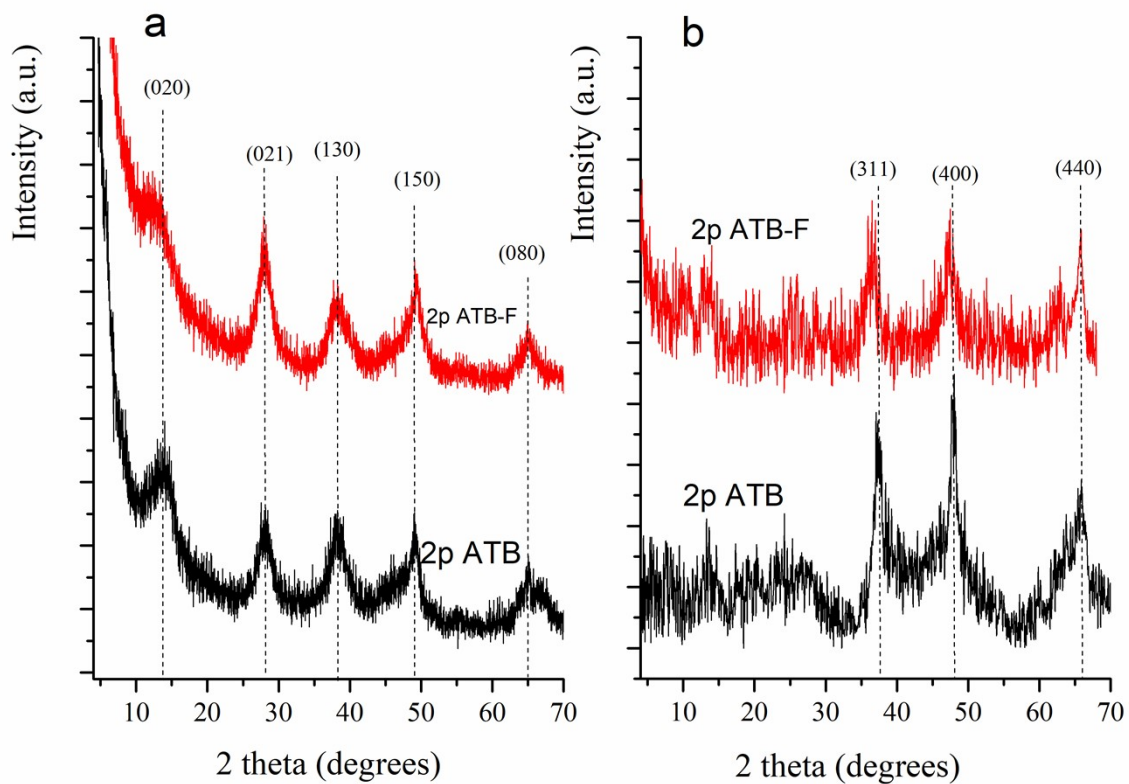

Fig S2.  $^{19}\text{F}$  NMR MAS spectrum of sample 2p ATB-F

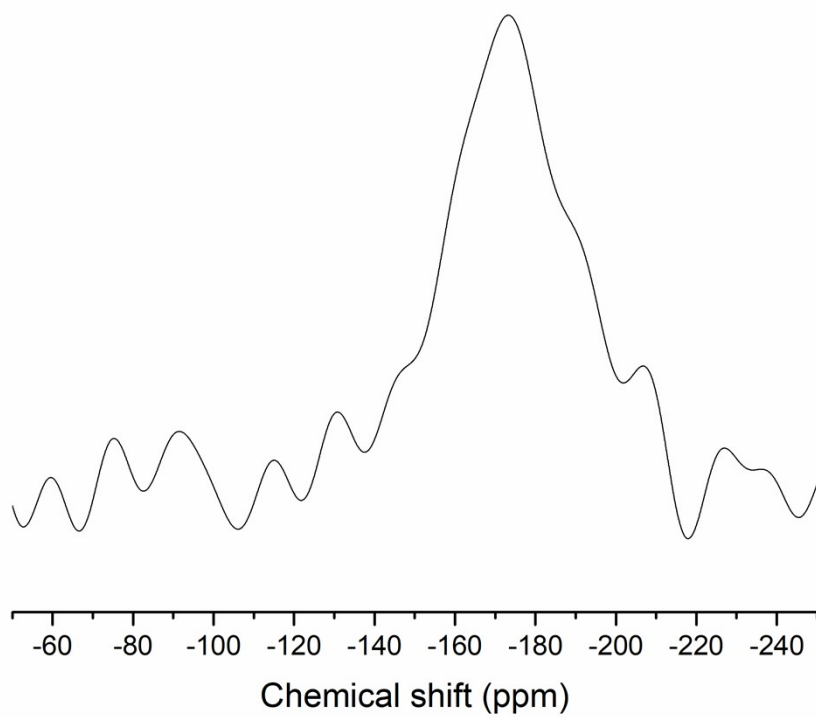

Fig S3. XPS spectra of F1s in fluorinated alumina samples synthesized by sol-gel using 2 butanol (2bATB-F) and 2 propanol (2pATP-F) as solvents.

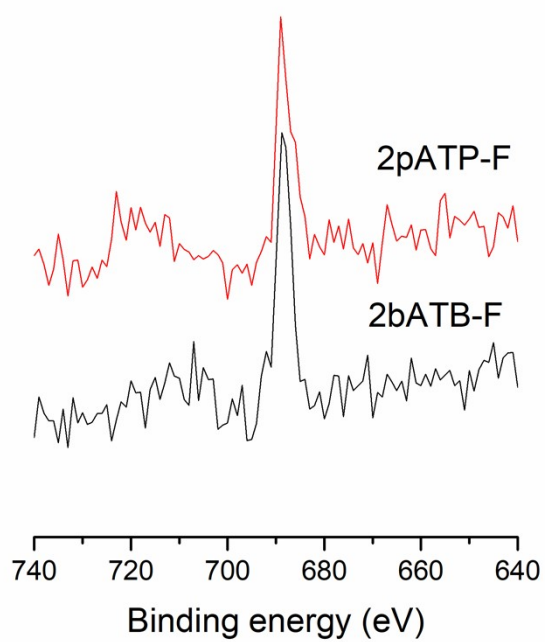

Fig S4. FTIR spectra of alumina samples synthesized by sol-gel using 2 butanol.

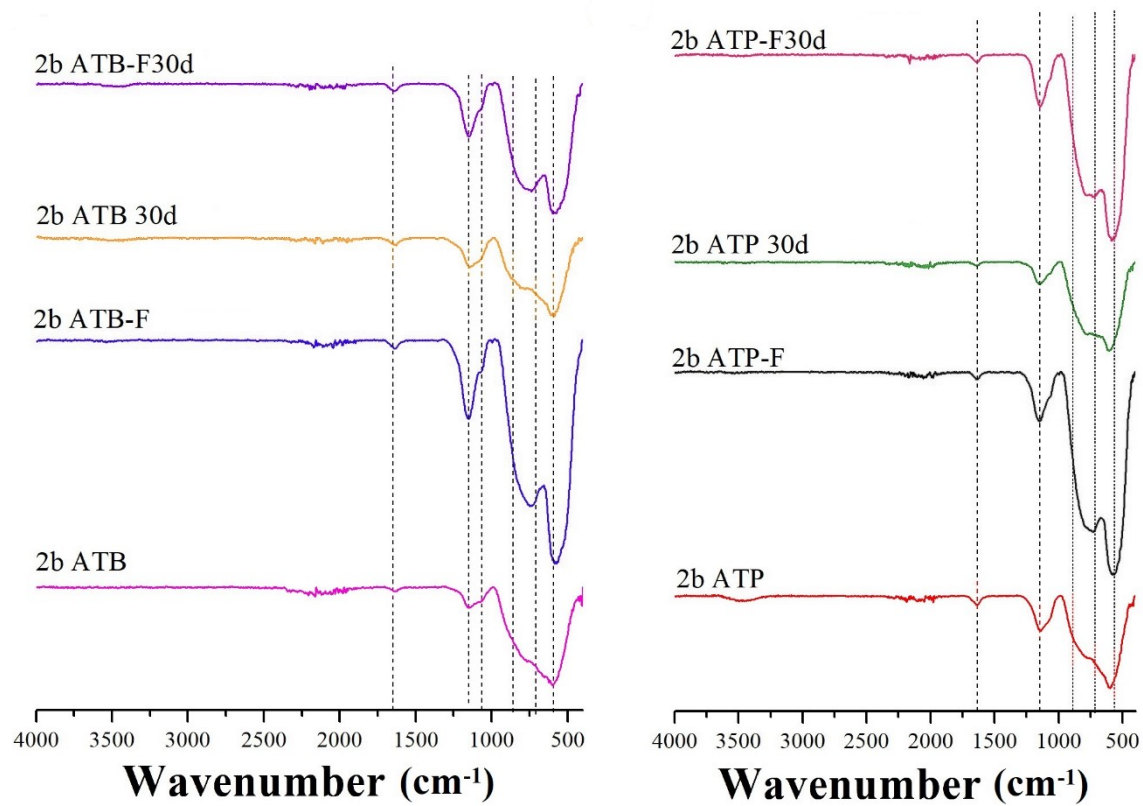

Fig S5. FTIR spectra of alumina samples synthesized by sol-gel using 2 butanol and colored with anthocyanin.

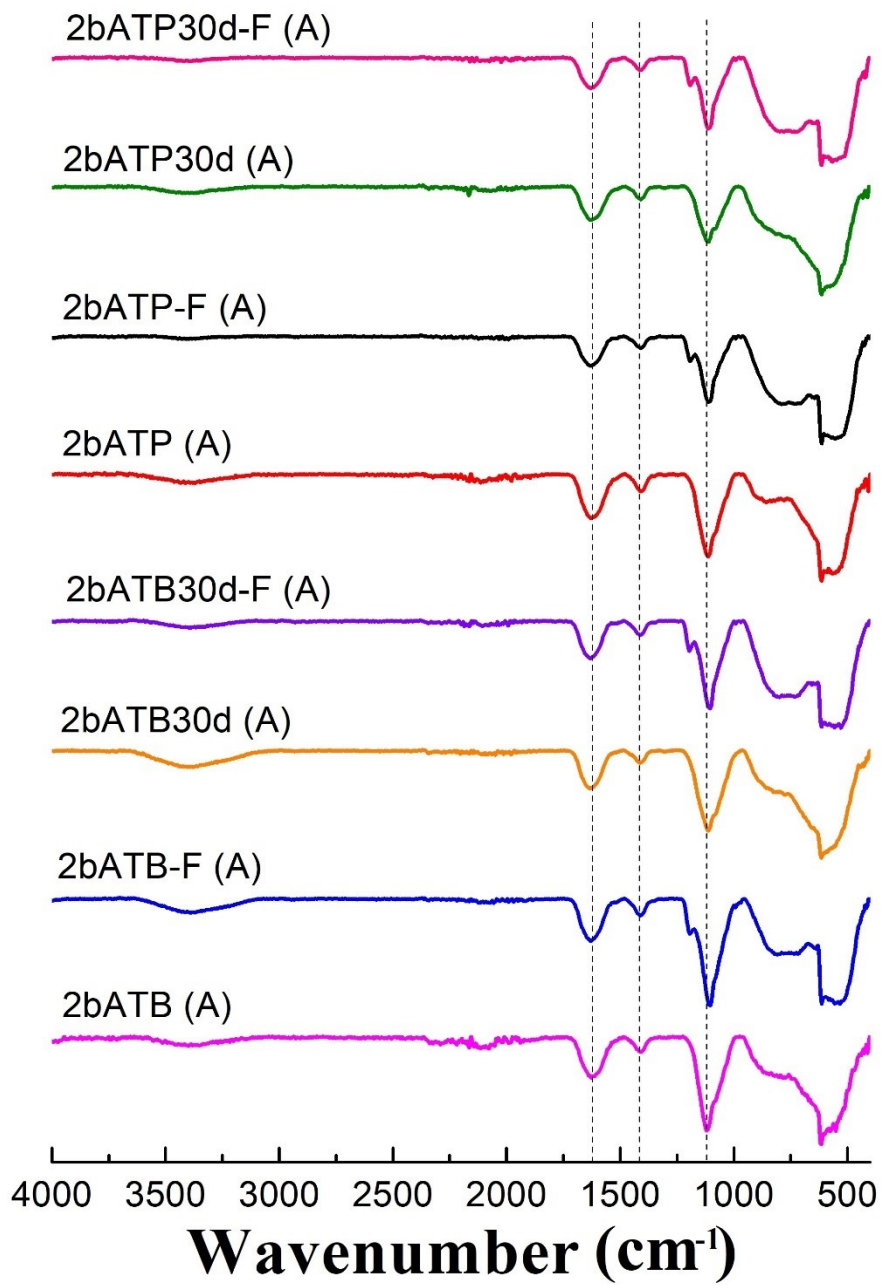

Fig S6. FTIR spectra of alumina samples synthesized by sol-gel using 2 butanol and colored with betacyanin.

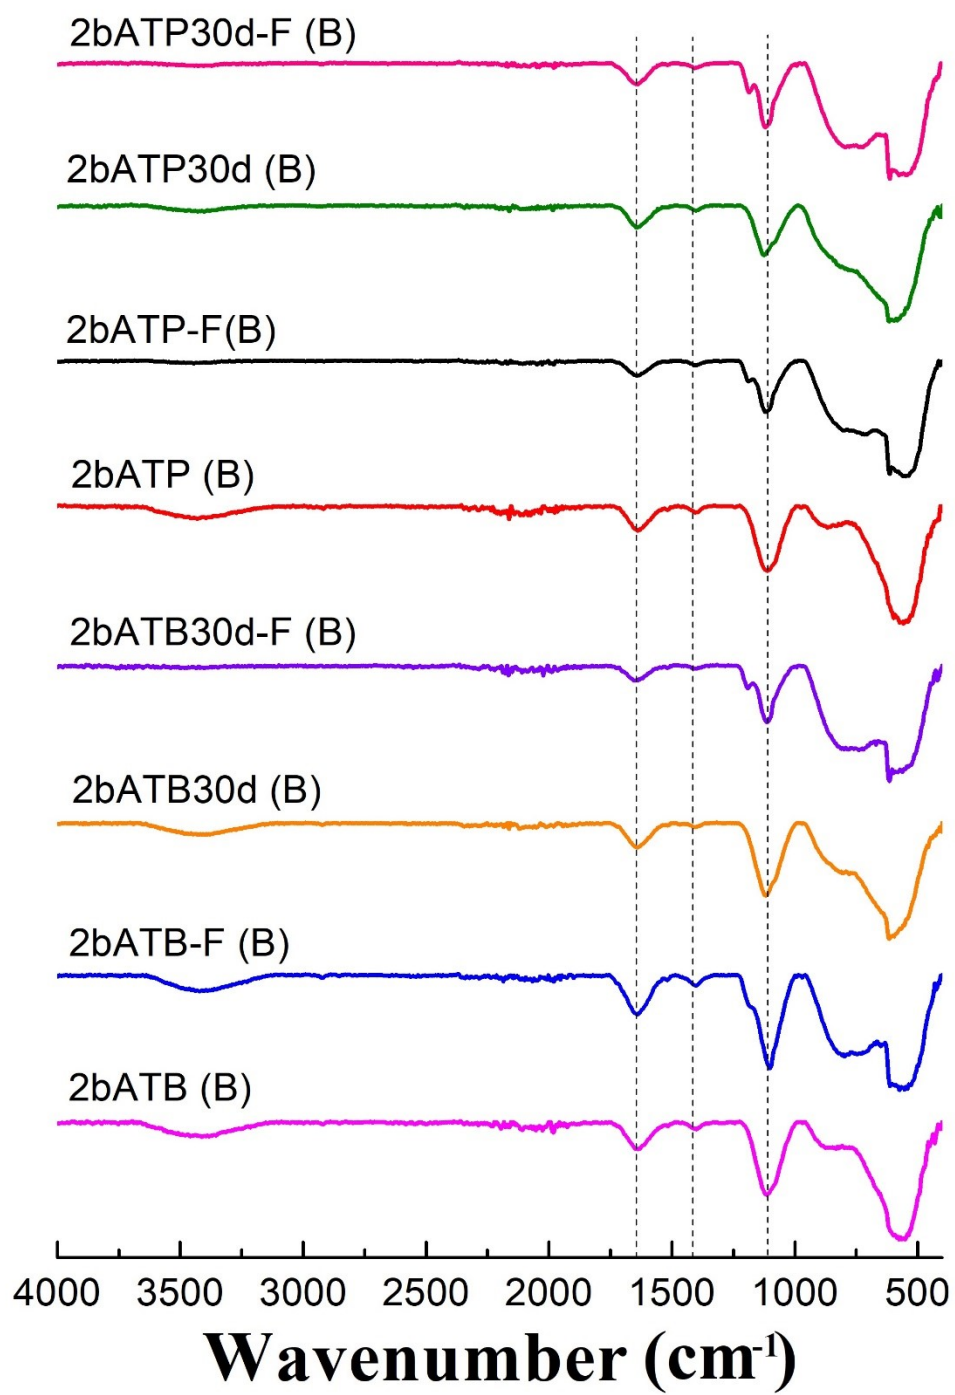

Supplement: d2dt01294d1.pdf [file d2dt01294d1.pdf]
